# Supplementary material for: Enhancement of the catalytic activity of ordered mesoporous TiO2by using carbon fiber support and appropriate evaluation of synergy between surface adsorption and photocatalysis by Langmuir–Hinshelwood (L–H) integration equation
Source: Royal Society of Chemistry journal article supplement (doi:10.1039/c5ra21083f), 2015-01-01
Supplement: c5ra21083f1.pdf [file c5ra21083f1.pdf]

## Supporting Information Figure legends

Fig.S1. Chemical structure (a) and electronic spectra of 1 mg L<sup>-1</sup> AO7 in an aqueous solution at pH 7 (b).

Fig. S2. XPS spectra of individual lines of O1s of NST (a), OMT (b), NST/CFs (c) and OMT/CFs (d) measured at high resolution , respectively.

Figure S1

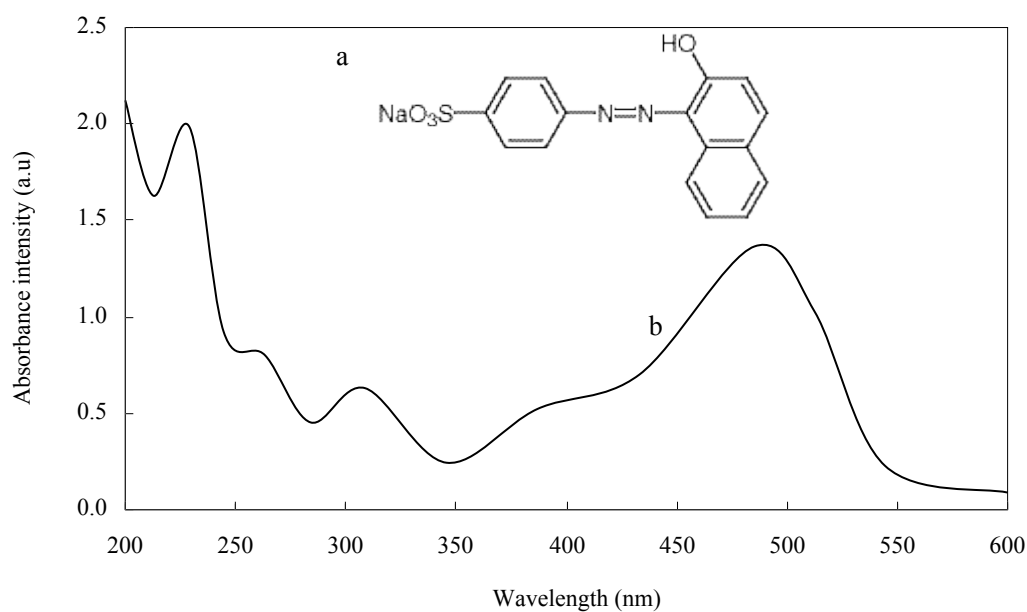

Fig.S2

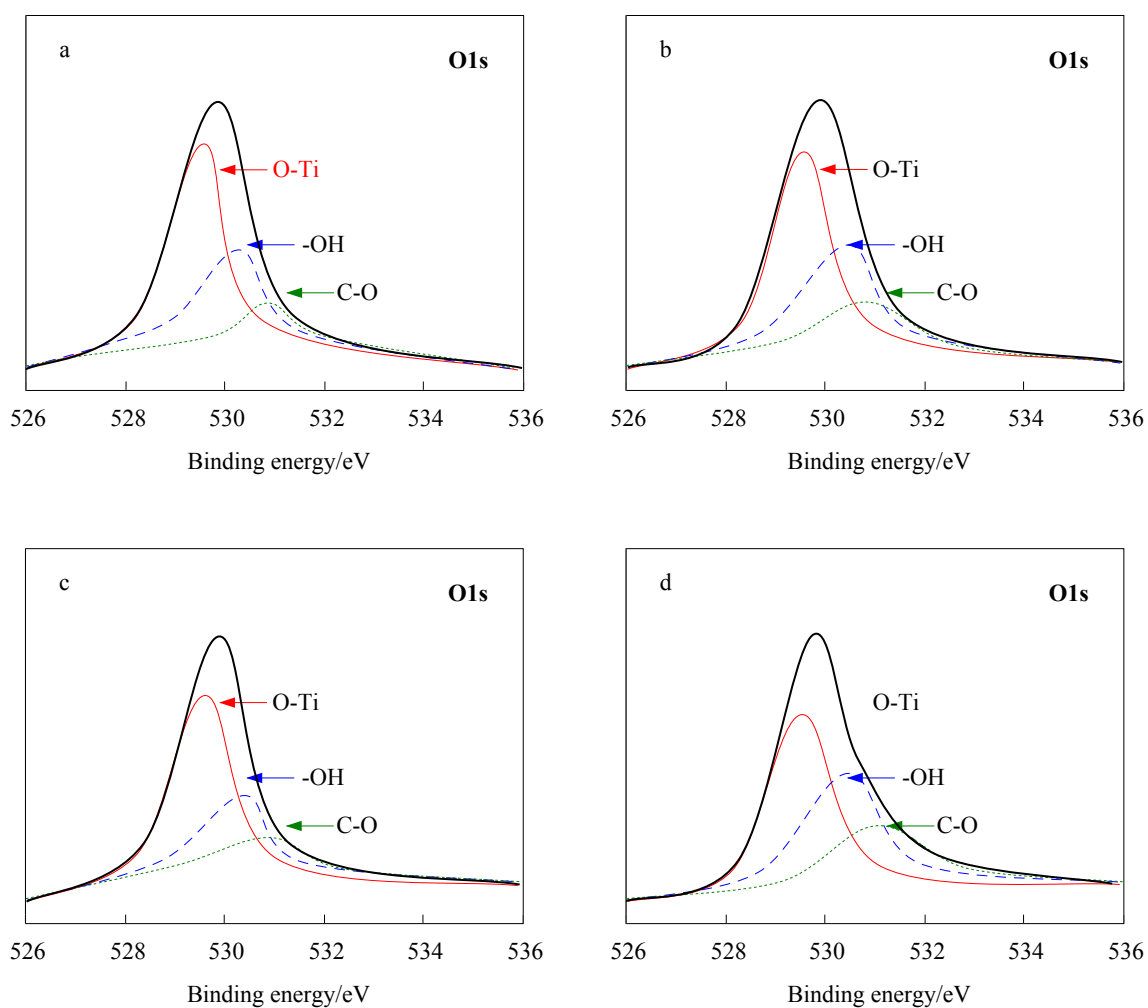

The O1s spectrum shown in Fig.S2 implies chemical states of oxygen corresponding to the Ti–O bond of TiO<sub>2</sub> (529.6 eV), C–O bond of CFs (531.4 eV), and hydroxyl groups (530.5 eV), which can be compared to published data. The hydroxyl groups on the TiO<sub>2</sub> surface may be attributed to a reaction of adsorbed H<sub>2</sub>O with TiO<sub>2</sub> to form Ti–OH, such as  $\text{H}_2\text{O} + \text{Ti–O–Ti} \rightarrow 2\text{Ti–OH}$ . The surface hydroxyl groups, which act as electron donors for photogenerated H<sup>+</sup>, can be oxidized to hydroxyl radicals (•OH), which can attack almost all organic pollutants. According to XPS spectra as shown in Fig.S2, OMPT/CFs have high hydroxyl content in comparison with others samples.
